# Supplementary material for: In Patients Hospitalized for Community-Acquired Pneumonia, SARS-CoV-2 Is Associated with Worse Clinical Outcomes When Compared to Influenza
Source: MDPI journal article supplement (doi:10.3390/pathogens12040571), 2023-04-07
Supplement: s1 [file s1]

**Supplemental Table S1. Highest recorded inflammatory markers.**

|                               | <u>Influenza CAP</u> | <u>SARS-CoV-2 CAP</u> | <u>SMD</u> |
|-------------------------------|----------------------|-----------------------|------------|
|                               | 259                  | 518                   |            |
| CRP mg/L (median [IQR])       | 86.7 [61.2, 170.8]   | 34.0 [12.6, 103.5]    | 0.519      |
| <i>Missing (n)</i>            | 253                  | 119                   |            |
| D-Dimer ng/mL (median [IQR])  | NA [NA, NA]          | 803.0 [356.0, 1677.0] |            |
| <i>Missing (n)</i>            | 259                  | 137                   |            |
| Ferritin ng/mL (median [IQR]) | NA [NA, NA]          | 418.0 [222.0, 774.0]  |            |
| <i>Missing (n)</i>            | 259                  | 137                   |            |
| IL-6 pg/mL (median [IQR])     | NA [NA, NA]          | 30.4 [12.7, 82.0]     |            |
| <i>Missing (n)</i>            | 259                  | 356                   |            |

<sup>1</sup> CRP: C-reactive protein, IL-6: interleukin-6, SMD: standardized mean difference
